# Supplementary material for: Fused silver nanowires with silica sol nanoparticles for smooth, flexible, electrically conductive and highly stable transparent electrodes
Source: Royal Society of Chemistry journal article supplement (doi:10.1039/c8ra01569d), 2018-01-01
Supplement: c8ra01569d1.pdf [file c8ra01569d1.pdf]

## Fused Silver Nanowires with Silica Sol Nanoparticles for Smooth, Flexible, Electrically and Highly Stable Transparent Electrodes

Shengchi Bai<sup>‡</sup>, Haifeng Wang<sup>§,\*</sup>, Hui Yang<sup>‡,§</sup>, He Zhang<sup>§</sup>, Tianrui Chen<sup>§</sup>, Xingzhong Guo<sup>‡,\*</sup>

<sup>‡</sup> *State Key Laboratory of Silicon Materials, School of Materials Science and Engineering,  
Zhejiang University, Hangzhou, China, 310027;*

<sup>§</sup> *Zhejiang-California International Nanosystems Institute, Zhejiang University, Hangzhou,  
China, 310058.*

*\*Corresponding author: whf5560@163.com (H. Wang); msewj01@zju.edu.cn (X. Guo)*

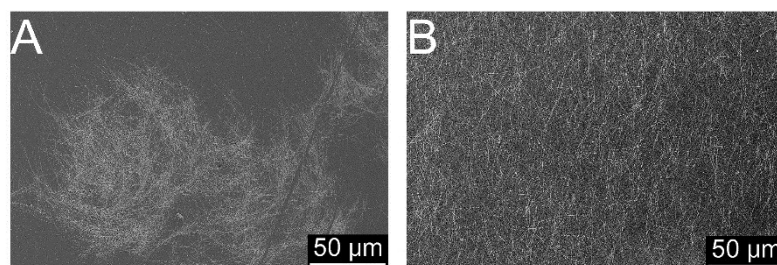

**Figure S1** TCE fabricated with AgNW ink without HPMC (A) and with HPMC (B).
